# Supplementary material for: Novel Epidemic Metrics to Communicate Outbreak Risk at the Municipality Level: Dengue and Zika in the Dominican Republic
Source: MDPI journal article supplement (doi:10.3390/v14010162), 2022-01-17
Supplement: s1 [file s1]

## Supplementary Material

**Table S1. Age and sex standardised attack rates of dengue by province.** Respective lower and upper 95% confidence intervals are shown.

| Province of Residence  | Standardised Attack Rate | Lower 95% Confidence Interval | Upper 95% Confidence Interval |
|------------------------|--------------------------|-------------------------------|-------------------------------|
| Hermanas Mirabal       | 58.07921                 | 57.85644                      | 58.30198                      |
| San José de Ocoa       | 49.20185                 | 48.846                        | 49.5577                       |
| Sánchez Ramírez        | 48.49327                 | 48.36307                      | 48.62347                      |
| La Vega                | 38.80868                 | 38.75974                      | 38.85763                      |
| Santiago Rodríguez     | 38.07062                 | 37.71529                      | 38.42594                      |
| Barahona               | 33.09816                 | 33.00535                      | 33.19097                      |
| Duarte                 | 31.81822                 | 31.75006                      | 31.88637                      |
| Distrito Nacional      | 29.4844                  | 29.4635                       | 29.5053                       |
| María Trinidad Sánchez | 29.00574                 | 28.86502                      | 29.14646                      |
| Hato Mayor             | 25.61707                 | 25.3909                       | 25.84324                      |
| Monseñor Nouel         | 25.23547                 | 25.12044                      | 25.35049                      |
| Azua                   | 24.86613                 | 24.7818                       | 24.95045                      |
| San Juan               | 23.91775                 | 23.83329                      | 24.00222                      |
| Santiago               | 23.75802                 | 23.73761                      | 23.77842                      |
| Santo Domingo          | 23.2899                  | 23.28279                      | 23.29702                      |
| Monte Cristi           | 22.7714                  | 22.59429                      | 22.94851                      |
| Puerto Plata           | 20.60499                 | 20.5439                       | 20.66609                      |
| Pedernales             | 19.88183                 | 19.3406                       | 20.42306                      |
| Dajabón                | 19.72239                 | 19.43175                      | 20.01304                      |
| Españat                | 18.54744                 | 18.4613                       | 18.63359                      |
| Valverde               | 18.18141                 | 18.06645                      | 18.29636                      |
| Peravia                | 18.0829                  | 17.9858                       | 18.18001                      |
| Samaná                 | 17.80326                 | 17.62246                      | 17.98406                      |
| San Cristóbal          | 16.987                   | 16.95681                      | 17.01718                      |
| Baoruco                | 14.92881                 | 14.7493                       | 15.10832                      |
| El Seibo               | 14.84969                 | 14.64179                      | 15.05759                      |
| Monte Plata            | 14.07224                 | 13.9758                       | 14.16868                      |
| San Pedro de Macorís   | 12.76493                 | 12.70028                      | 12.82958                      |
| Elías Piña             | 11.80936                 | 11.54331                      | 12.07541                      |
| Independencia          | 11.66837                 | 11.36343                      | 11.9733                       |
| La Altagracia          | 11.36612                 | 11.30525                      | 11.42699                      |
| La Romana              | 4.964588                 | 4.891426                      | 5.03775                       |

**Table S2. Age and sex standardised attack rates of Zika by province.** Respective lower and upper 95% confidence intervals are shown.

| Province of Residence | Standardised Attack Rate | Lower 95% Confidence Interval | Upper 95% Confidence Interval |
|-----------------------|--------------------------|-------------------------------|-------------------------------|
| San José de Ocoa      | 21.160                   | 20.773                        | 21.548                        |
| Independencia         | 13.370                   | 13.015                        | 13.724                        |
| Distrito Nacional     | 9.334                    | 9.315                         | 9.353                         |

|                        |       |       |       |
|------------------------|-------|-------|-------|
| Santo Domingo          | 7.291 | 7.284 | 7.298 |
| Valverde               | 7.288 | 7.171 | 7.405 |
| Puerto Plata           | 6.348 | 6.288 | 6.408 |
| Azua                   | 5.855 | 5.756 | 5.954 |
| San Cristóbal          | 5.681 | 5.649 | 5.714 |
| Hato Mayor             | 5.430 | 5.193 | 5.666 |
| Españolat              | 5.358 | 5.273 | 5.444 |
| Samaná                 | 5.032 | 4.846 | 5.218 |
| La Altagracia          | 5.003 | 4.940 | 5.067 |
| Santiago Rodríguez     | 4.326 | 3.957 | 4.694 |
| Dajabón                | 3.435 | 3.115 | 3.756 |
| Monte Plata            | 3.138 | 3.026 | 3.250 |
| Peravia                | 3.034 | 2.932 | 3.137 |
| Pedernales             | 3.000 | 2.347 | 3.653 |
| Santiago               | 2.684 | 2.665 | 2.703 |
| Monseñor Nouel         | 2.588 | 2.473 | 2.704 |
| La Romana              | 2.465 | 2.390 | 2.541 |
| Hermanas Mirabal       | 2.254 | 2.033 | 2.475 |
| La Vega                | 1.920 | 1.872 | 1.969 |
| Elías Piña             | 1.770 | 1.337 | 2.204 |
| Sánchez Ramírez        | 1.766 | 1.628 | 1.905 |
| El Seibo               | 1.680 | 1.445 | 1.915 |
| Duarte                 | 1.622 | 1.555 | 1.690 |
| Barahona               | 1.620 | 1.507 | 1.734 |
| San Juan               | 1.531 | 1.428 | 1.635 |
| San Pedro de Macorís   | 1.388 | 1.324 | 1.453 |
| Monte Cristi           | 1.334 | 1.159 | 1.508 |
| María Trinidad Sánchez | 1.223 | 1.082 | 1.364 |
| Baoruco                | 1.116 | 0.897 | 1.334 |

**Table S3. Age and sex standardised attack rates of total dengue by municipality.**

Respective lower and upper 95% confidence intervals are shown.

| <b>Municipality of Residence</b> | <b>Standardised Attack Rate (per 10,000 population)</b> | <b>Lower 95% confidence interval</b> | <b>Higher 95% confidence interval</b> |
|----------------------------------|---------------------------------------------------------|--------------------------------------|---------------------------------------|
| Jarabacoa                        | 99.80548                                                | 99.46349                             | 100.1475                              |
| Ramón Santana                    | 89.70886                                                | 87.66433                             | 91.75339                              |
| Fantino                          | 89.63507                                                | 88.68542                             | 90.58471                              |
| Jima Abajo                       | 85.40193                                                | 84.76547                             | 86.03838                              |
| Las Salinas                      | 84.32807                                                | 80.65512                             | 88.00103                              |
| Villa Tapia                      | 76.6103                                                 | 75.76196                             | 77.45864                              |
| La Ciénaga                       | 61.26256                                                | 59.35661                             | 63.16851                              |
| San José De Ocoa                 | 56.34095                                                | 55.80489                             | 56.87701                              |
| Salcedo                          | 55.89944                                                | 55.37521                             | 56.42366                              |
| Cotuí                            | 52.90987                                                | 52.64865                             | 53.17108                              |
| Villa González                   | 50.6077                                                 | 50.0964                              | 51.11899                              |
| Cabrera                          | 49.68283                                                | 48.84336                             | 50.5223                               |

|                              |          |          |          |
|------------------------------|----------|----------|----------|
| San Ignacio De Sabaneta      | 47.72824 | 47.11682 | 48.33966 |
| Tenares                      | 46.91322 | 46.17762 | 47.64882 |
| Sabana Larga                 | 44.4343  | 42.25702 | 46.61158 |
| Mella                        | 43.95176 | 39.41779 | 48.48573 |
| Villa Rivas                  | 42.39822 | 41.82511 | 42.97133 |
| Enriquillo                   | 40.41046 | 39.09039 | 41.73054 |
| Barahona                     | 39.92808 | 39.71827 | 40.13789 |
| Cayetano Germosen            | 36.2763  | 33.31374 | 39.23887 |
| Castillo                     | 34.20579 | 32.9165  | 35.49509 |
| La Mata                      | 33.82985 | 33.32753 | 34.33217 |
| Villa Los Almácigos          | 33.65289 | 31.96162 | 35.34416 |
| Monte Cristi                 | 33.55048 | 32.73864 | 34.36232 |
| Tabara Arriba                | 33.22181 | 32.13656 | 34.30706 |
| San Francisco De Macorís     | 33.00379 | 32.89722 | 33.11036 |
| Fundación                    | 32.87632 | 30.57498 | 35.17766 |
| Arenoso                      | 31.6767  | 30.29701 | 33.0564  |
| Las Matas De Farfán          | 31.04217 | 30.60128 | 31.48306 |
| Hato Mayor del Rey           | 30.47963 | 30.16355 | 30.79572 |
| Rancho Arriba                | 29.52567 | 27.21086 | 31.84048 |
| Bonao                        | 28.53502 | 28.3801  | 28.68995 |
| Azua                         | 28.52515 | 28.32759 | 28.7227  |
| Nagua                        | 28.4949  | 28.23753 | 28.75227 |
| Juan De Herrera              | 28.18342 | 26.64899 | 29.71785 |
| Santo Domingo Norte          | 27.69646 | 27.66495 | 27.72797 |
| Bohechío                     | 26.75297 | 24.73621 | 28.76974 |
| Santo Domingo Oeste          | 26.73674 | 26.68871 | 26.78477 |
| Licey Al Medio               | 26.71107 | 25.89305 | 27.5291  |
| La Vega                      | 26.66034 | 26.58019 | 26.74048 |
| Puerto Plata                 | 26.08195 | 25.95665 | 26.20724 |
| Villa Vázquez                | 25.68708 | 24.28856 | 27.0856  |
| Las Guaranas                 | 25.51559 | 24.12641 | 26.90478 |
| Santiago                     | 25.51513 | 25.48629 | 25.54397 |
| Sabana Yegua                 | 25.48877 | 24.52804 | 26.4495  |
| Pueblo Viejo                 | 25.37458 | 23.77025 | 26.97891 |
| Sosua                        | 24.61137 | 24.21918 | 25.00355 |
| Vicente Noble                | 24.41566 | 23.59058 | 25.24075 |
| Santo Domingo Este           | 24.37927 | 24.3605  | 24.39804 |
| Guayubín                     | 24.11644 | 23.56681 | 24.66607 |
| San Juan                     | 24.09508 | 23.94515 | 24.245   |
| El Pino                      | 24.01008 | 20.64867 | 27.37149 |
| Samaná                       | 23.23657 | 22.92029 | 23.55285 |
| Loma De Cabrera              | 23.13504 | 21.94176 | 24.32832 |
| Yamasá                       | 22.79716 | 22.48249 | 23.11182 |
| Mao                          | 22.63276 | 22.37781 | 22.8877  |
| Piedra Blanca                | 22.60557 | 21.71943 | 23.4917  |
| San Cristóbal                | 22.14353 | 22.06685 | 22.22022 |
| Pepillo Salcedo (Manzanillo) | 22.08113 | 20.02022 | 24.14204 |
| Pedernales                   | 21.8935  | 21.17831 | 22.60869 |
| Peralta                      | 21.65648 | 20.44372 | 22.86924 |
| Laguna Salada                | 21.46498 | 20.67118 | 22.25878 |

|                        |          |          |          |
|------------------------|----------|----------|----------|
| Dajabón                | 21.4077  | 20.74168 | 22.07371 |
| Padre Las Casas        | 21.26606 | 20.37922 | 22.1529  |
| Cambita Garabitos      | 21.24353 | 20.68836 | 21.79869 |
| Las Yayas de Viajama   | 21.15576 | 20.11913 | 22.1924  |
| Moca                   | 20.47941 | 20.36602 | 20.59279 |
| Bisonó                 | 20.39457 | 19.94033 | 20.84881 |
| Los Alcarrizos         | 20.32296 | 20.26306 | 20.38286 |
| Jaquimeyes             | 20.25948 | 15.84741 | 24.67154 |
| Bajos De Haina         | 20.13347 | 19.99304 | 20.2739  |
| Duvergé                | 19.97502 | 18.46921 | 21.48083 |
| Barí                   | 19.94201 | 19.82603 | 20.05799 |
| Río San Juan           | 19.8371  | 18.44851 | 21.2257  |
| Los Hidalgos           | 19.81484 | 18.04952 | 21.58016 |
| El Peñón               | 18.89265 | 14.26395 | 23.52135 |
| Consuelo               | 18.70276 | 18.0918  | 19.31372 |
| Cabral                 | 18.43594 | 17.23146 | 19.64042 |
| El Factor              | 17.73807 | 16.92954 | 18.54659 |
| Tamboril               | 17.57079 | 17.19646 | 17.94513 |
| Neiba                  | 17.0401  | 16.54895 | 17.53126 |
| Sabana De La Mar       | 16.99978 | 15.80979 | 18.18976 |
| Monción                | 16.88539 | 15.04676 | 18.72402 |
| Partido                | 16.86654 | 13.86123 | 19.87185 |
| Pedro Brand            | 16.85734 | 16.64279 | 17.07189 |
| Miches                 | 16.80266 | 15.95822 | 17.6471  |
| Villa Jaragua          | 16.42362 | 14.81411 | 18.03314 |
| Tamayo                 | 15.92995 | 15.27947 | 16.58042 |
| Villa Montellano       | 15.47258 | 14.49432 | 16.45085 |
| Sabana Grande De Boya  | 15.02801 | 14.45046 | 15.60555 |
| Las Charcas            | 14.93584 | 13.30949 | 16.56218 |
| Pimentel               | 14.58927 | 13.48946 | 15.68907 |
| Santa Cruz de El Seibo | 14.26439 | 13.98758 | 14.54121 |
| Oviedo                 | 14.10137 | 11.79814 | 16.40459 |
| Yaguatero              | 14.01328 | 13.60936 | 14.41719 |
| Villa Isabela          | 13.76339 | 12.5372  | 14.98958 |
| Bánica                 | 13.58093 | 10.6233  | 16.53855 |
| Comendador             | 13.54216 | 12.95233 | 14.132   |
| Estebanía              | 13.51789 | 10.20601 | 16.82978 |
| Los Ríos               | 13.45697 | 11.05918 | 15.85476 |
| San Antonio De Guerra  | 13.36972 | 12.99537 | 13.74407 |
| Hondo Valle            | 12.9614  | 11.26777 | 14.65502 |
| El Cercado             | 12.85318 | 11.92014 | 13.78623 |
| Castañuelas            | 12.64453 | 11.40537 | 13.8837  |
| Esperanza              | 12.28771 | 11.99754 | 12.57787 |
| Higüey                 | 12.26903 | 12.20223 | 12.33583 |
| San José De Las Matas  | 12.16991 | 11.65137 | 12.68846 |
| Cevicos                | 11.80692 | 10.36058 | 13.25327 |
| Guananico              | 11.76473 | 7.921584 | 15.60787 |
| Las Terrenas           | 11.5613  | 10.5313  | 12.59131 |
| Polo                   | 11.50662 | 8.687499 | 14.32574 |
| El Llano               | 10.96535 | 9.174346 | 12.75636 |

|                           |          |          |          |
|---------------------------|----------|----------|----------|
| Constanza                 | 10.89276 | 10.57411 | 11.21142 |
| Sánchez                   | 10.68355 | 9.908002 | 11.45909 |
| Gaspar Hernández          | 10.62947 | 10.10862 | 11.15031 |
| San Pedro De Macorís      | 10.51065 | 10.41208 | 10.60922 |
| Vallejuelo                | 10.47525 | 8.895904 | 12.05459 |
| Monte Plata               | 10.4132  | 10.00501 | 10.8214  |
| Santo Domingo de Guzmán   | 10.2152  | 10.20796 | 10.22244 |
| Maimón                    | 9.692846 | 8.692952 | 10.69274 |
| Boca Chica                | 9.677225 | 9.563648 | 9.790802 |
| Nizao                     | 9.432479 | 8.772205 | 10.09275 |
| Janico                    | 9.330062 | 8.110934 | 10.54919 |
| Imbert                    | 9.234064 | 8.329125 | 10.139   |
| Galván                    | 9.135609 | 8.016497 | 10.25472 |
| Paraíso                   | 9.129083 | 8.076553 | 10.18161 |
| Puñal                     | 8.974125 | 8.534393 | 9.413857 |
| Jimaní                    | 8.950573 | 8.027251 | 9.873896 |
| Altamira                  | 8.907666 | 7.743731 | 10.0716  |
| Villa Altagracia          | 8.794135 | 8.593711 | 8.99456  |
| Luperón                   | 8.506038 | 7.315192 | 9.696883 |
| Bayaguana                 | 8.400559 | 7.81252  | 8.988598 |
| Juan Santiago             | 8.099237 | 0.161985 | 16.03649 |
| Guayabal                  | 7.956494 | 4.057812 | 11.85518 |
| La Descubierta            | 7.743339 | 5.575204 | 9.911474 |
| Restauración              | 7.602448 | 5.473763 | 9.731134 |
| Las Matas De Santa Cruz   | 7.171422 | 5.414424 | 8.928421 |
| La Romana                 | 7.07478  | 6.940153 | 7.209407 |
| El Valle                  | 7.068844 | 4.297857 | 9.839831 |
| Sabana Iglesia            | 6.993931 | 5.470808 | 8.517054 |
| Peralvillo                | 6.794156 | 5.906386 | 7.681926 |
| Eugenio Maria De Hostos   | 6.708117 | 3.42114  | 9.995094 |
| Guayacanes                | 6.471506 | 5.203091 | 7.739922 |
| Pedro Santana             | 5.994467 | 3.057178 | 8.931756 |
| Los Cacaos                | 5.894755 | 4.244224 | 7.545287 |
| Quisqueya                 | 5.81898  | 4.868546 | 6.769413 |
| Jamao Al Norte            | 5.21818  | 2.661272 | 7.775088 |
| Los Llanos                | 4.373047 | 3.51593  | 5.230164 |
| San Gregorio De Nigua     | 4.073791 | 3.503461 | 4.644122 |
| Sabana Grande De Palenque | 3.363778 | 2.264944 | 4.462612 |
| Cristóbal                 | 3.129884 | 1.085027 | 5.174742 |
| Guaymate                  | 2.681658 | 1.630448 | 3.732868 |
| Villa Hermosa             | 2.480608 | 2.286128 | 2.675088 |
| San Rafael Del Yuma       | 2.220714 | 1.495281 | 2.946148 |
| Postrer Río               | 2.05144  | -1.96938 | 6.072261 |

**Table S4. Age and sex standardised attack rates of Zika per municipality.** Respective lower and upper 95% confidence intervals are shown.

| <b>Municipality of Residence</b> | <b>Standardised Attack Rate (per 10,000 population)</b> | <b>Lower 95% confidence interval</b> | <b>Higher 95% confidence interval</b> |
|----------------------------------|---------------------------------------------------------|--------------------------------------|---------------------------------------|
| Jimani                           | 32.3110079                                              | 31.199962764                         | 33.4220531                            |
| Sabana Grande De Palenque        | 31.1635729                                              | 29.988945902                         | 32.3381999                            |
| San Jose De Ocoa                 | 25.6569420                                              | 25.085491882                         | 26.2283920                            |
| Sabana Larga                     | 24.9988175                                              | 22.419992094                         | 27.5776429                            |
| Mella                            | 22.1680593                                              | 16.736884748                         | 27.5992338                            |
| Laguna Salada                    | 13.8565123                                              | 13.057725133                         | 14.6552995                            |
| Los Alcarrizos                   | 11.9794935                                              | 11.915862626                         | 12.0431245                            |
| Puerto Plata                     | 11.4667693                                              | 11.347854645                         | 11.5856839                            |
| Azua                             | 8.8848804                                               | 8.658719782                          | 9.1110410                             |
| Yamasa                           | 8.5608894                                               | 8.179540673                          | 8.9422381                             |
| Santo Domingo Norte              | 8.4313207                                               | 8.399107466                          | 8.4635339                             |
| Sabana Iglesia                   | 8.3813333                                               | 7.012382194                          | 9.7502844                             |
| Villa Los Almacigos              | 7.8986302                                               | 5.963465804                          | 9.8337946                             |
| Hato Mayor del Rey               | 7.5330013                                               | 7.204897261                          | 7.8611054                             |
| San Cristobal                    | 7.3748640                                               | 7.296305708                          | 7.4534224                             |
| Santo Domingo Este               | 6.9967543                                               | 6.979329043                          | 7.0141795                             |
| Moca                             | 6.6630892                                               | 6.552414200                          | 6.7737643                             |
| Mao                              | 6.5777972                                               | 6.334542791                          | 6.8210516                             |
| Maimon                           | 6.4023271                                               | 5.356613639                          | 7.4480405                             |
| Estebania                        | 6.1978345                                               | 2.148582610                          | 10.2470863                            |
| Boca Chica                       | 6.1964392                                               | 6.073762201                          | 6.3191162                             |
| Pueblo Viejo                     | 5.9857849                                               | 4.030428520                          | 7.9411413                             |
| Guaymate                         | 5.7685724                                               | 4.355272143                          | 7.1818726                             |
| Samana                           | 5.6791387                                               | 5.361106943                          | 5.9971705                             |
| Janico                           | 5.6002079                                               | 4.602352682                          | 6.5980631                             |
| Esperanza                        | 5.5881001                                               | 5.275166493                          | 5.9010337                             |
| Dajabon                          | 5.5087043                                               | 4.833888002                          | 6.1835205                             |
| Las Yayas de Viajama             | 5.4675100                                               | 4.127970032                          | 6.8070499                             |
| Sanchez                          | 5.2444350                                               | 4.453735608                          | 6.0351345                             |
| Higuey                           | 5.2339712                                               | 5.165580662                          | 5.3023618                             |
| Santo Domingo Oeste              | 4.9618576                                               | 4.916623941                          | 5.0070913                             |
| Cambita Garabitos                | 4.8807317                                               | 4.242982784                          | 5.5184807                             |
| San Ignacio De Sabaneta          | 4.7929775                                               | 4.166695081                          | 5.4192599                             |
| Las Salinas                      | 4.7902755                                               | 0.095805510                          | 9.4847455                             |
| Sabana Yegua                     | 4.7736030                                               | 3.604070248                          | 5.9431357                             |
| Luperon                          | 4.5556290                                               | 3.280052865                          | 5.8312051                             |
| El Pino                          | 4.4579821                                               | 1.545433789                          | 7.3705304                             |
| Ramon Santana                    | 4.3993225                                               | 2.243654453                          | 6.5549905                             |
| La Descubierta                   | 4.1547668                                               | 1.440319165                          | 6.8692145                             |
| Bajos De Haina                   | 4.0324240                                               | 3.886061953                          | 4.1787861                             |
| Tabara Arriba                    | 4.0215527                                               | 2.707845475                          | 5.3352599                             |
| Las Guaranas                     | 4.0192872                                               | 2.706320080                          | 5.3322544                             |

|                          |           |              |           |
|--------------------------|-----------|--------------|-----------|
| Duverge                  | 3.9938524 | 2.428262244  | 5.5594425 |
| El Llano                 | 3.9517350 | 0.079034700  | 7.8244353 |
| Pedro Brand              | 3.9407016 | 3.706647803  | 4.1747554 |
| Pedernales               | 3.8533242 | 3.014155784  | 4.6924925 |
| Santo Domingo de Guzmán  | 3.5813698 | 3.574236191  | 3.5885034 |
| Bani                     | 3.3054351 | 3.185460033  | 3.4254101 |
| Villa Tapia              | 3.0550819 | 2.199658977  | 3.9105048 |
| Yaguajay                 | 2.9979435 | 2.545945881  | 3.4499412 |
| Las Terrenas             | 2.8254353 | 1.717864634  | 3.9330059 |
| Santiago                 | 2.8209334 | 2.794975507  | 2.8468913 |
| Cayetano Germosen        | 2.8138487 | 0.056276973  | 5.5714204 |
| Neiba                    | 2.7419134 | 2.144785610  | 3.3390412 |
| Barahona                 | 2.7377511 | 2.493842378  | 2.9816598 |
| Salcedo                  | 2.6390676 | 2.121810327  | 3.1563248 |
| La Vega                  | 2.6375850 | 2.559256741  | 2.7159133 |
| Comendador               | 2.6288381 | 1.598333586  | 3.6593427 |
| Peralta                  | 2.5874098 | 1.319578974  | 3.8552405 |
| Guayubin                 | 2.5377422 | 1.985078332  | 3.0904060 |
| Fantino                  | 2.4828577 | 1.509577508  | 3.4561380 |
| La Romana                | 2.4590175 | 2.332183957  | 2.5858510 |
| Guayacanes               | 2.4273391 | 1.237942933  | 3.6167352 |
| Licey Al Medio           | 2.4193452 | 1.629025784  | 3.2096647 |
| Villa Altagracia         | 2.3683721 | 2.136271672  | 2.6004726 |
| Bonao                    | 2.2882133 | 2.133561601  | 2.4428649 |
| Villa Gonzalez           | 2.2798786 | 1.783371703  | 2.7763855 |
| San Juan                 | 2.2505690 | 2.074124375  | 2.4270136 |
| La Mata                  | 2.2182605 | 1.674786661  | 2.7617343 |
| Bisno                    | 2.1160769 | 1.655242388  | 2.5769114 |
| San Francisco De Macoris | 1.9711141 | 1.869446083  | 2.0727821 |
| Castanuelas              | 1.9551102 | 0.677771522  | 3.2324488 |
| Villa Hermosa            | 1.9428478 | 1.731293231  | 2.1544023 |
| Tamboril                 | 1.9257006 | 1.548263248  | 2.3031379 |
| Guayabal                 | 1.9073927 | -1.831097011 | 5.6458825 |
| Peralvillo               | 1.8898764 | 0.963836984  | 2.8159159 |
| Santa Cruz de El Seibo   | 1.8710630 | 1.565456042  | 2.1766700 |
| San Pedro De Macoris     | 1.5842176 | 1.490124677  | 1.6783105 |
| Nagua                    | 1.5703194 | 1.313833891  | 1.8268049 |
| Altamira                 | 1.5438997 | 0.030877994  | 3.0569214 |
| Pedro Santana            | 1.5394848 | -1.477905401 | 4.5568750 |
| Cotui                    | 1.5062534 | 1.237866434  | 1.7746404 |
| San Antonio De Guerra    | 1.4871201 | 1.070726469  | 1.9035137 |
| Nizao                    | 1.4756720 | 0.752592713  | 2.1987513 |
| Castillo                 | 1.4643032 | 0.029286064  | 2.8993203 |
| Fundacion                | 1.4457480 | -1.387918078 | 4.2794141 |
| San Rafael Del Yuma      | 1.3746690 | 0.701081169  | 2.0482567 |
| Piedra Blanca            | 1.3607211 | 0.471716637  | 2.2497255 |
| El Factor                | 1.3308969 | 0.461377576  | 2.2004161 |
| Punal                    | 1.2720042 | 0.856482823  | 1.6875256 |
| Jima Abajo               | 1.2345934 | 0.629642633  | 1.8395442 |
| Tenares                  | 1.1261471 | 0.390397665  | 1.8618966 |

|                         |           |              |           |
|-------------------------|-----------|--------------|-----------|
| Miches                  | 1.1019171 | 0.022038343  | 2.1817959 |
| Monte Plata             | 1.0452904 | 0.635536553  | 1.4550442 |
| Imbert                  | 1.0206539 | 0.020413078  | 2.0208947 |
| Los Cacaos              | 1.0094193 | -0.969042510 | 2.9878811 |
| Vicente Noble           | 1.0040338 | 0.020080675  | 1.9879869 |
| Cristobal               | 1.0002930 | -0.960281281 | 2.9608673 |
| Padre Las Casas         | 0.9838419 | 0.019676838  | 1.9480069 |
| Las Charcas             | 0.9819012 | -0.942625159 | 2.9064276 |
| Restauracion            | 0.9803555 | -0.941141299 | 2.9018523 |
| San Gregorio De Nigua   | 0.9420560 | 0.326579411  | 1.5575326 |
| Enriquillo              | 0.9369993 | -0.899519289 | 2.7735178 |
| Sosua                   | 0.9251375 | 0.562483600  | 1.2877914 |
| Cevicos                 | 0.9205966 | -0.883772781 | 2.7249661 |
| Las Matas De Farfan     | 0.8601461 | 0.298183977  | 1.4221082 |
| Gaspar Hernandez        | 0.8527920 | 0.295634556  | 1.4099494 |
| Las Matas De Santa Cruz | 0.8518128 | -0.817740285 | 2.5213659 |
| Loma De Cabrera         | 0.8265447 | -0.793482887 | 2.4465722 |
| Juan De Herrera         | 0.8032091 | -0.771080766 | 2.3774990 |
| Los Hidalgos            | 0.7504047 | -0.720388514 | 2.2211979 |
| Constanza               | 0.6942031 | 0.354043562  | 1.0343626 |
| Villa Isabela           | 0.6891028 | -0.661538716 | 2.0397444 |
| Rio San Juan            | 0.6527960 | -0.626684125 | 1.9322761 |
| Villa Vazquez           | 0.6285566 | -0.603414334 | 1.8605275 |
| Cabrera                 | 0.5035959 | -0.483452092 | 1.4906440 |
| Monte Cristi            | 0.4637674 | -0.445216695 | 1.3727515 |
| San Jose De Las Matas   | 0.4387227 | 0.008774453  | 0.8686709 |
| Jarabacoa               | 0.4355955 | 0.151006446  | 0.7201846 |
| Tamayo                  | 0.3854663 | -0.370047622 | 1.1409802 |
| Consuelo                | 0.3807781 | -0.365546933 | 1.1271030 |
| Villa Rivas             | 0.3642234 | -0.349654457 | 1.0781012 |
| Bayaguana               | 0.3230117 | -0.310091264 | 0.9561147 |
| Sabana Grande De Boya   | 0.3042786 | -0.292107421 | 0.9006645 |
| Arenoso                 | NA        | NA           | NA        |
| Banica                  | NA        | NA           | NA        |
| Bohechio                | NA        | NA           | NA        |
| Cabral                  | NA        | NA           | NA        |
| El Cercado              | NA        | NA           | NA        |
| El Penon                | NA        | NA           | NA        |
| El Valle                | NA        | NA           | NA        |
| Eugenio Maria De Hostos | NA        | NA           | NA        |
| Galvan                  | NA        | NA           | NA        |
| Guananico               | NA        | NA           | NA        |
| Haiti                   | NA        | NA           | NA        |
| Hondo Valle             | NA        | NA           | NA        |
| Jamao Al Norte          | NA        | NA           | NA        |
| Jaquimeyes              | NA        | NA           | NA        |
| Juan Santiago           | NA        | NA           | NA        |
| La Cienaga              | NA        | NA           | NA        |
| Los Llanos              | NA        | NA           | NA        |
| Los Rios                | NA        | NA           | NA        |



|                                  |    |    |    |
|----------------------------------|----|----|----|
| Moncion                          | NA | NA | NA |
| Otro Extranjero                  | NA | NA | NA |
| Oviedo                           | NA | NA | NA |
| Paraiso                          | NA | NA | NA |
| Partido                          | NA | NA | NA |
| Pepillo Salcedo (Manzani<br>llo) | NA | NA | NA |
| Pimentel                         | NA | NA | NA |
| Polo                             | NA | NA | NA |
| Postrer Rio                      | NA | NA | NA |
| Quisqueya                        | NA | NA | NA |
| Rancho Arriba                    | NA | NA | NA |
| Sabana De La Mar                 | NA | NA | NA |
| Vallejuelo                       | NA | NA | NA |
| Villa Jaragua                    | NA | NA | NA |
| Villa Montellano                 | NA | NA | NA |
